# Supplementary material
Source: PubMed Central journal article supplement (PMC7584888)
Supplement: pnas.2016954117.sapp.pdf [file pnas.2016954117.sapp.pdf]

## Supplementary information

### Supplementary Methods

#### Protein analysis

Yeast cultures were grown in 50 ml to OD<sub>600</sub> between 0.4 to 0.7. Cells were harvested by centrifugation, were transferred to a 1.5 ml tube and resuspend in 400 µl of gradient buffer ((1), 20 mM HEPES pH7.5, 1 mM EGTA, 5 mM MgCl<sub>2</sub>, 10 mM KCl, 10% glycerol, 1 × complete mini protease inhibitor cocktail from Roche, 3 mM phenylmethanesulfonyl fluoride and 100 µg ml<sup>-1</sup> of cycloheximide). As described previously (1), cells were disrupted by agitation with an equal volume of glass beads for 5 min (30 sec beating, 30 sec cooling on ice). Cell debris was removed by spinning down for 2 min at 4000 g, and the supernatants (total fraction; T) were used for electrophoresis and Western blot analysis. Protein concentrations were determined by Bradford assay or absorbance at 280 nm.

For sucrose fractionation analysis, 200 µl of extracted proteins were layered on top of 200 µl of a 25% sucrose pad. Samples were centrifuged in 3.5 ml (13 × 51 mm) open-top thick wall polycarbonate tubes, using an SW55Ti rotor at 260,000 g for 80 min. Soluble fractions (S) were transferred and the pellets were resuspended in 100 µl of gradient buffer (pellet fractions; P). For western blot analysis (2), samples were resolved on a NuPAGE™ 4-12% Bis-Tris gel (Thermo Fisher Scientific) and transferred to a PVDF transfer membrane (Thermo Fisher Scientific) in transfer buffer (25 mM Tris, 380 mM glycine, 20% methanol) at 100 V for 40 min. Membranes were blocked for 1 h in Tris-buffered saline–Tween 20 (TBST; 10 mM Tris, pH 7.4, 100 mM NaCl, 0.05% [vol/vol] Tween 20)) plus 2.5% skim milk. The membranes were then probed with corresponding anti-bodies, as described below, in TBST plus 1% skim milk for 1 h at room temperature. The membranes were washed five times with TBST over the course of 30 min and probed with horseradish peroxidase-conjugated anti-rabbit IgG secondary antibody (Bio-Rad) at 1:1,000 dilution for 1 h. The membranes were then washed five times in TBST over the course of 30 min and evaluated for chemiluminescence using the Amersham ECL Western blotting detection reagents and analysis system (GE Healthcare) according to the manufacturer's protocol.

#### References:

1. F. Sherman, "Getting started with yeast" in Guide to yeast genetics and molecular biology, C. Guthrie, G. R. Fink, Eds. (Academic Press, San Diego, 1991), vol. 194, pp. 3 - 21.

2. M. Son *et al.*, The HEX1 gene of *Fusarium graminearum* is required for fungal asexual reproduction and pathogenesis and for efficient viral RNA accumulation of *Fusarium graminearum* virus 1. *J. Virol.* 87, 10356 - 10367 (2013).
3. M. Son, R. B. Wickner, Nonsense-mediated mRNA decay factors cure most [PSI<sup>+</sup>] prion variants. *Proc. Natl. Acad. Sci. USA* 115, E1184-E1193 pii: 201717495. doi: 201717410.201711073/pnas.1717495115 (2018).
4. A. Brachmann, U. Baxa, R. B. Wickner, Prion generation *in vitro*: amyloid of Ure2p is infectious. *Embo J* 24, 3082 - 3092 (2005).
5. R. B. Wickner, A. C. Kelly, E. E. Bezsonov, H. E. Edskes, Prion propagation is controlled by inositol polyphosphates. *Proc. Natl. Acad. Sci. USA* 114, E8402-E8410 (2017).
6. R. S. Sikorski, P. Hieter, A system of shuttle vectors and yeast host strains designed for efficient manipulation of DNA in *Saccharomyces cerevisiae*. *Genetics* 122, 19 - 27 (1989).
7. T. Nakayashiki, C. P. Kurtzman, H. K. Edskes, R. B. Wickner, Yeast prions [URE3] and [PSI<sup>+</sup>] are diseases. *Proc Natl Acad Sci U S A* 102, 10575-10580 (2005).
8. H. K. Edskes, R. B. Wickner, Conservation of a portion of the *S. cerevisiae* Ure2p prion domain that interacts with the full - length protein. *Proc. Natl. Acad. Sci. USA* 99 (Suppl. 4), 16384-16391 (2002).

### Supplementary Figures

**Fig. S1.** [PSI+] prion variants isolated in *ssb1/2Δ*, *zuo1Δ*, or *ssz1Δ* are lost on cytoduction to an isogenic WT strain. Strains WT [PSI+] MS224, WT [psi-] MS109 strain, and Ura<sup>-</sup> cytoductants from *ssb1/2Δ* [PSI+sbs], *zuo1Δ* [PSI+zos], or *ssz1Δ* [PSI+szs] into a WT recipient (top to bottom) were transformed with a 2 μ plasmid pH770 (Vector) or pM18 encoding Sup35NM-GFP controlled by the GAL1 promoter. Ura<sup>-</sup> cytoductants were obtained by transfer of cytoplasm from the mutant [PSI+] donor strain into the WT recipient [psi-] ρ<sup>o</sup> strain MS173 (Table 7). After GAL induction for 16 h in 2% (wt/vol) raffinose, 2% (wt/vol) galactose minimal medium, Sup35NM-GFP aggregates were observed using fluorescence confocal microscopy.

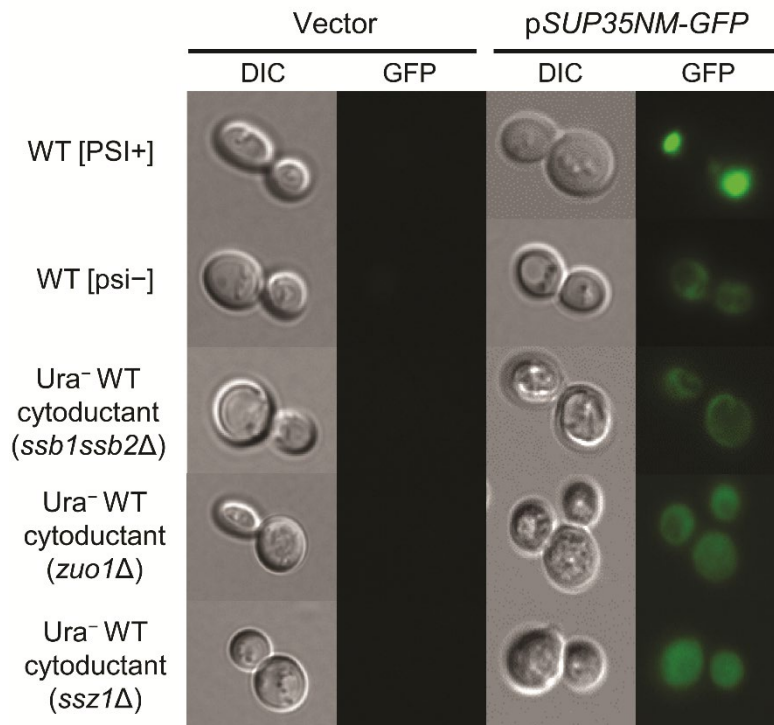

**Fig. S2.** The effects of each RAC deletion on the stability or fraction of its partner. (A) Zuo1p is destabilized in *ssz1* $\Delta$  [psi-] strain, but less so in *ssz1* $\Delta$  [PSI+] strain. Same amount of total cell extracts from each strain were separated by SDS/PAGE and further blotted with antibody specific to Zuo1p. (B) Ssz1p is completely destabilized in *zuo1* $\Delta$  [psi-] strain, but stably remained only in soluble fraction of *zuo1* $\Delta$  [PSI+]. Corresponding amounts of T, S, and P fraction were separated by SDS/PAGE and further analyzed by western blot, with the use of antibody specific to Ssz1p.

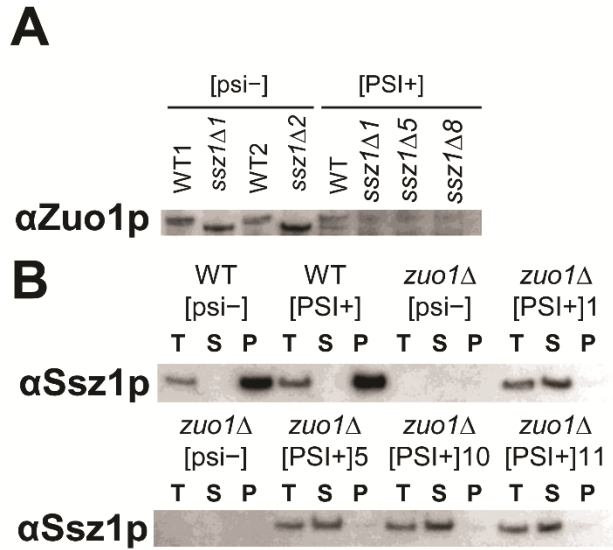

**Fig. S3.** Most [URE3] prion variants isolated in *ssz1* $\Delta$  strains are not cured by restoration of the WT allele of *SSZ1*. [URE3] isolates generated in WT BY241 or *ssz1::kanMX* deletion strains MS581 and MS582 were mated for 2 days on YPAD with isogenic WT MS574 and replica-plated to minimal media with and without adenine. The presence of *DAL5* promoted *ADE2* in all strains enables scoring [URE3]. All diploids formed with WT are generally Ade<sup>+</sup> as a result of maintenance of [URE3] (see also Table S3).

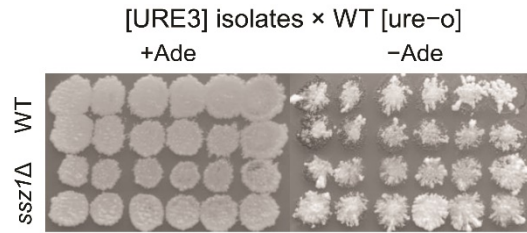

## Supplementary Tables

Table S1. Strains used in this study

| Strain       | Genotype                                                                                   | Reference    |
|--------------|--------------------------------------------------------------------------------------------|--------------|
| BY4741/MS157 | <i>MATa ura3 leu2 his3 met15</i> [psi-][PIN+]                                              | C. Brachmann |
| BY4742/MS317 | <i>MATα ura3 leu2 his3 lys2</i> [psi-][PIN+]                                               | C. Brachmann |
| MS327        | <i>MATa ura3 leu2 his3 met15 ade1-14 kar1Δ15</i> [psi-][PIN+]                              | (3)          |
| MS173        | <i>MATα ura3 leu2 his3 lys2 ade1-14 kar1Δ15</i> [psi-][PIN+]                               | (3)          |
| MS515        | <i>MATa ura3 leu2 his3 met15 ade1-14 ssb1::kanMX ssb2::natMX</i> [psi-][PIN+]              | This study   |
| MS520        | <i>MATα ura3 leu2 his3 lys2 ade1-14 kar1Δ15 ssb1::kanMX ssb2::natMX</i> [psi-][PIN+]       | This study   |
| MS527        | <i>MATa ura3 leu2 his3 met15 ade1-14 kar1Δ15 zuo1::kanMX</i> [psi-][PIN+]                  | This study   |
| MS528        | <i>MATα ura3 leu2 his3 lys2 ade1-14 kar1Δ15 zuo1::kanMX</i> [psi-][PIN+]                   | This study   |
| MS510        | <i>MATa ura3 leu2 his3 met15 ade1-14 ssz1::kanMX</i> [psi-][PIN+]                          | This study   |
| MS514        | <i>MATα ura3 leu2 his3 lys2 ade1-14 kar1Δ15 ssz1::kanMX</i> [psi-][PIN+]                   | This study   |
| MS560        | MS515 <i>zuo1::kanMX</i>                                                                   | This study   |
| MS224        | <i>MATa ura3 leu2 his3 met15 ade1-14 kar1Δ15</i> [PSI+s]                                   | (3)          |
| MS562        | <i>MATα ura3 leu2 his3 lys2 ade1-14 kar1Δ15</i> [psi-][PIN+] <sup>WT (MS327)</sup>         | This study   |
| MS563        | <i>MATα ura3 leu2 his3 lys2 ade1-14 kar1Δ15</i> [psi-][PIN+] <sup>ssb1/2Δ (MS515)</sup>    | This study   |
| MS564        | <i>MATα ura3 leu2 his3 lys2 ade1-14 kar1Δ15</i> [psi-][PIN+] <sup>zuo1Δ (MS527)</sup>      | This study   |
| MS565        | <i>MATα ura3 leu2 his3 lys2 ade1-14 kar1Δ15</i> [psi-][PIN+] <sup>ssz1Δ (MS510)</sup>      | This study   |
| BY241/MS573  | <i>MATa ura3 leu2 trp1 kar1Δ15 P<sub>DAL5</sub>:ADE2 P<sub>DAL5</sub>:CAN1</i>             | (4)          |
| αBY241/MS574 | <i>MATα his3::TRP1 leu2 trp1 kar1Δ15 P<sub>DAL5</sub>:ADE2 P<sub>DAL5</sub>:CAN1</i>       | H. K. Edskes |
| MS581, 582   | <i>MATa ura3 leu2 trp1 kar1Δ15 P<sub>DAL5</sub>:ADE2 P<sub>DAL5</sub>:CAN1 ssz1::kanMX</i> | This study   |
| MS80         | <i>MATα ura3-52 leu2-3, 112 his3Δ200 trp1-89 ade1-14</i> [PSI+] strong                     | S. Liebman   |
| MS81         | <i>MATα ura3-52 leu2-3, 112 his3Δ200 trp1-89 ade1-14</i> [PSI+] weak                       | S. Liebman   |

Table S2. Plasmids used in this study

| Name        | Description                                      | Source        |
|-------------|--------------------------------------------------|---------------|
| p1520       | <i>CEN LEU2 URA3-14 P<sub>GAL1</sub>:SUP35NM</i> | (5)           |
| pRS313/pM24 | <i>CEN HIS3</i>                                  | (6)           |
| pM76        | pRS313 <i>P<sub>SSB1</sub>:SSB1</i>              | This study    |
| pH75        | pRS313 <i>P<sub>ZUO1</sub>:ZUO1</i>              | This study    |
| pM78        | pRS313 <i>P<sub>SSZ1</sub>:SSZ1</i>              | This study    |
| pRS423/pM84 | 2 $\mu$ <i>HIS3</i>                              | (6)           |
| pM85        | pRS423 <i>P<sub>SSB1</sub>:SSB1</i>              | This study    |
| pM87        | pRS423 <i>P<sub>ZUO1</sub>:ZUO1</i>              | This study    |
| pM86        | pRS423 <i>P<sub>SSZ1</sub>:SSZ1</i>              | This study    |
| pH770/pM14  | pRS423 <i>P<sub>GAL1</sub></i>                   | (3)           |
| pM18        | pRS423 <i>P<sub>GAL1</sub>:SUP35NM-GFP</i>       | (3)           |
| pM60        | <i>CEN LEU2 P<sub>ADH1</sub>:RNQ1-GFP</i>        | (7)           |
| pH382/pM88  | <i>CEN LEU2 P<sub>GAL1</sub>:URE2N (1-65)</i>    | H. Edskes (8) |
| pRS316/pM2  | <i>CEN URA3</i>                                  | (6)           |
| pM89        | pRS316 <i>P<sub>SSZ1</sub>:SSZ1</i>              | This study    |

Table S3. Confirmation for elimination of each [PSI+] variant in WT recipient.

| Donor                        | Recipient         | Cytoductants     |       |
|------------------------------|-------------------|------------------|-------|
|                              |                   | Ura <sup>+</sup> | Total |
| <i>ssb1/2Δ</i> [PSI+sb12s]1  | WT ρ <sup>o</sup> | 1                | 8     |
| <i>ssb1/2Δ</i> [PSI+sb12s]2  |                   | 1                | 12    |
| <i>ssb1/2Δ</i> [PSI+sb12s]3  |                   | 3                | 9     |
| <i>ssb1/2Δ</i> [PSI+sb12s]4  |                   | 5                | 10    |
| <i>ssb1/2Δ</i> [PSI+sb12s]5  |                   | 0                | 6     |
| <i>ssb1/2Δ</i> [PSI+sb12s]6  |                   | 1                | 4     |
| <i>ssb1/2Δ</i> [PSI+sb12s]7  |                   | 0                | 12    |
| <i>ssb1/2Δ</i> [PSI+sb12s]8  |                   | 0                | 8     |
| <i>ssb1/2Δ</i> [PSI+sb12s]9  |                   | 0                | 9     |
| <i>ssb1/2Δ</i> [PSI+sb12s]10 |                   | 0                | 4     |
| <i>zuo1Δ</i> [PSI+zo1s]1     | WT ρ <sup>o</sup> | 2                | 13    |
| <i>zuo1Δ</i> [PSI+zo1s]2     |                   | 5                | 12    |
| <i>zuo1Δ</i> [PSI+zo1s]3     |                   | 3                | 8     |
| <i>zuo1Δ</i> [PSI+zo1s]4     |                   | 0                | 9     |
| <i>zuo1Δ</i> [PSI+zo1s]5     |                   | 0                | 10    |
| <i>zuo1Δ</i> [PSI+zo1s]6     |                   | 1                | 10    |
| <i>zuo1Δ</i> [PSI+zo1s]7     |                   | 0                | 7     |
| <i>zuo1Δ</i> [PSI+zo1s]8     |                   | 0                | 10    |
| <i>zuo1Δ</i> [PSI+zo1s]9     |                   | 1                | 10    |
| <i>zuo1Δ</i> [PSI+zo1s]10    |                   | 0                | 14    |
| <i>ssz1Δ</i> [PSI+sz1s]1     | WT ρ <sup>o</sup> | 2                | 8     |
| <i>ssz1Δ</i> [PSI+sz1s]2     |                   | 1                | 12    |
| <i>ssz1Δ</i> [PSI+sz1s]3     |                   | 0                | 6     |
| <i>ssz1Δ</i> [PSI+sz1s]4     |                   | 0                | 10    |
| <i>ssz1Δ</i> [PSI+sz1s]5     |                   | 3                | 10    |
| <i>ssz1Δ</i> [PSI+sz1s]6     |                   | 1                | 8     |
| <i>ssz1Δ</i> [PSI+sz1s]7     |                   | 1                | 6     |
| <i>ssz1Δ</i> [PSI+sz1s]8     |                   | 0                | 5     |
| <i>ssz1Δ</i> [PSI+sz1s]9     |                   | 2                | 10    |
| <i>ssz1Δ</i> [PSI+sz1s]10    |                   | 3                | 7     |

Ssb1/2p, Zuo1p, and Ssz1p-sensitive [PSI+] variants were transferred by cytoduction (cytoplasmic mixing) from [PSI+] isolates in each SSB-RACΔ strain into the WT strain. In the case of *ssb-racΔ* recipients, cytoductants were so few that analysis was impossible.



Table S4. The stability of [PSI+] variant is differentiated by stability in doubly heterozygous diploids with identical ribosome-associated chaperone composition.

|                | [PSI+] isolate | × <i>zuo1Δ</i> [psi-] (Ura+/total) | × <i>ssz1Δ</i> [psi-] (Ura+/total) | × <i>ssb1/2Δzuo1Δ</i> [psi-] (Ura+/total) |
|----------------|----------------|------------------------------------|------------------------------------|-------------------------------------------|
| <i>ssb1/2Δ</i> | sbs1           | 4/10                               | 3/10                               | 10/10                                     |
|                | sbs2           | 5/10                               | 1/10                               | 10/10                                     |
|                | sbs3           | 3/10                               | 0/10                               | 10/10                                     |
|                | sbs4           | 3/10                               | 1/10                               | 10/10                                     |
|                | sbs5           | 4/10                               | 1/10                               | 9/10                                      |
|                | sbs6           | 2/10                               | 2/10                               | 9/10                                      |
|                | sbs7           | 4/10                               | 0/10                               | 9/10                                      |
|                | sbs8           | 3/10                               | 1/10                               | 10/10                                     |
|                | sbs9           | 4/10                               | 1/10                               | 9/10                                      |
|                | sbs10          | 3/10                               | 1/10                               | 10/10                                     |
|                | Total          | 35/100                             | 11/100                             | 96/100                                    |
|                | [PSI+] isolate | × <i>ssb1/2Δ</i> (Ura+/total)      | × <i>ssz1Δ</i> (Ura+/total)        | × <i>ssb1/2Δzuo1Δ</i> (Ura+/total)        |
| <i>zuo1Δ</i>   | zos1           | 0/10                               | 9/10                               | 10/10                                     |
|                | zos2           | 0/10                               | 10/10                              | 10/10                                     |
|                | zos3           | 1/10                               | 10/10                              | 9/10                                      |
|                | zos4           | 0/10                               | 8/10                               | 10/10                                     |
|                | zos5           | 1/10                               | 8/10                               | 9/10                                      |
|                | zos6           | 0/10                               | 8/10                               | 10/10                                     |
|                | zos7           | 2/10                               | 9/10                               | 10/10                                     |
|                | zos8           | 0/10                               | 8/10                               | 10/10                                     |
|                | zos9           | 0/10                               | 9/10                               | 10/10                                     |
|                | zos10          | 0/10                               | 8/10                               | 10/10                                     |
|                | Total          | 4/100                              | 87/100                             | 98/100                                    |
|                | [PSI+] isolate | × <i>ssb1/2Δ</i> (Ura+/total)      | × <i>zuo1Δ</i> (Ura+/total)        | × <i>ssb1/2Δzuo1Δ</i> (Ura+/total)        |
| <i>ssz1Δ</i>   | szs1           | 0/10                               | 10/10                              | 9/10                                      |
|                | szs2           | 0/10                               | 10/10                              | 9/10                                      |
|                | szs3           | 0/10                               | 8/10                               | 10/10                                     |
|                | szs4           | 1/10                               | 9/10                               | 10/10                                     |
|                | szs5           | 0/10                               | 9/10                               | 10/10                                     |
|                | szs6           | 0/10                               | 10/10                              | 10/10                                     |
|                | szs7           | 0/10                               | 9/10                               | 9/10                                      |
|                | szs8           | 1/10                               | 10/10                              | 10/10                                     |
|                | szs9           | 0/10                               | 10/10                              | 9/10                                      |
|                | szs10          | 0/10                               | 10/10                              | 8/10                                      |
|                | Total          | 2/100                              | 95/100                             | 94/100                                    |

Ten of [PSI+sbs], [PSI+zos], or [PSI+szs] variants carrying strains were mated with isogenic *ssb1/2Δ* [psi-] MS520, *zuo1Δ* [psi-] MS528, *ssz1Δ* [psi-] MS514 and *ssb1/2Δzuo1Δ* [psi-] MS560 strain and the doubly hetero-zygous diploid formed were subcloned on YPAD medium. Diploids were replica-plated to -Ura plate to test the stability of [PSI+].

Table S5. The effects of increased expression level of Ssb1p on each [PSI+] variant.

| [PSI+] isolates    | CEN plasmid Transformants<br>(Ura+/total) |                  | 2 $\mu$ plasmid Transformants<br>(Ura+/total) |                  |
|--------------------|-------------------------------------------|------------------|-----------------------------------------------|------------------|
|                    | pRS313                                    | pRS313<br>-SSB1  | pRS423                                        | pRS423<br>-SSB1  |
| sbs1               | 50/50                                     | 15/35            | 50/50                                         | 2/50             |
| sbs2               | 48/50                                     | 11/50            | 50/50                                         | 2/50             |
| sbs3               | 47/50                                     | 8/50             | 45/50                                         | 0/50             |
| sbs4               | 49/50                                     | 14/32            | 48/50                                         | 0/12             |
| sbs5               | 48/50                                     | 7/50             | 46/50                                         | 3/50             |
| sbs6               | 48/50                                     | 6/50             | 46/50                                         | 0/50             |
| sbs7               | 45/50                                     | 13/50            | 48/50                                         | 3/50             |
| sbs8               | 49/50                                     | 14/50            | 47/50                                         | 4/50             |
| sbs9               | 50/50                                     | 13/50            | 48/50                                         | 0/30             |
| sbs10              | 48/50                                     | 5/50             | 48/50                                         | 0/50             |
| Total<br>% of Ura+ | 482/500<br>96.4%                          | 106/467<br>22.7% | 476/100<br>95.2%                              | 14/442<br>3.2%   |
| zos1               | 46/50                                     | 48/50            | 46/50                                         | 50/50            |
| zos2               | 47/50                                     | 48/50            | 49/50                                         | 45/50            |
| zos3               | 50/50                                     | 42/50            | 44/50                                         | 38/50            |
| zos4               | 49/50                                     | 46/50            | 49/50                                         | 40/50            |
| zos5               | 47/50                                     | 49/50            | 50/50                                         | 39/50            |
| zos6               | 50/50                                     | 48/50            | 50/50                                         | 48/50            |
| zos7               | 45/50                                     | 49/50            | 48/50                                         | 48/50            |
| zos8               | 48/50                                     | 45/50            | 45/50                                         | 45/50            |
| zos9               | 50/50                                     | 49/50            | 49/50                                         | 48/50            |
| zos10              | 44/50                                     | 44/50            | 48/50                                         | 38/50            |
| Total<br>% of Ura+ | 476/500<br>95.2%                          | 468/500<br>93.6% | 477/500<br>95.4%                              | 439/500<br>87.8% |
| szs1               | 49/50                                     | 50/50            | 48/50                                         | 32/50            |
| szs2               | 50/50                                     | 49/50            | 50/50                                         | 30/50            |
| szs3               | 48/50                                     | 49/50            | 47/50                                         | 22/50            |
| szs4               | 46/50                                     | 48/50            | 48/50                                         | 24/50            |
| szs5               | 50/50                                     | 50/50            | 46/50                                         | 24/50            |
| szs6               | 49/50                                     | 50/50            | 48/50                                         | 27/50            |
| szs7               | 50/50                                     | 49/50            | 49/50                                         | 12/50            |
| szs8               | 48/50                                     | 48/50            | 48/50                                         | 18/50            |
| szs9               | 49/50                                     | 49/50            | 48/50                                         | 17/50            |
| szs10              | 50/50                                     | 48/50            | 49/50                                         | 32/50            |
| Total<br>% of Ura+ | 489/500<br>97.8%                          | 490/500<br>98.0% | 482/500<br>96.4%                              | 262/500<br>52.4% |

For each of *ssb1/2* $\Delta$ , *zuo1* $\Delta$  and *ssz1* $\Delta$ , ten [PSI+] isolates were transformed with pRS313 (pM24), pRS313-SSB1 (pM76), 2  $\mu$  plasmids pRS423 (pM84) and pRS423-SSB1 (pM85). In each case, SSB1 is expressed under its native promoter. Transformants were selected in the presence of uracil and were replica-plated to a plate lacking uracil to test the stability of [PSI+].

Table S6. The effects of overproduced Ssb1p, Zuo1p, and Ssz1p on [PSI+szs] variants.

| Isolate no. | ssz1Δ [PSI+szs] transformant<br>(Ura <sup>+</sup> /total transformants) |                 |                 |                |
|-------------|-------------------------------------------------------------------------|-----------------|-----------------|----------------|
|             | Vector                                                                  | pSSB1           | pZUO1           | pSSZ1          |
| 1           | 8/9                                                                     | 3/6             | 26/28           | 1/3            |
| 2           | 8/8                                                                     | 3/5             | 10/11           | 1/11           |
| 3           | 11/12                                                                   | 6/10            | 2/3             | 0/22           |
| 4           | 14/15                                                                   | 3/9             | 3/5             | 1/16           |
| 5           | 16/16                                                                   | 4/11            | 5/8             | 1/14           |
| 6           | 23/25                                                                   | 10/18           | 2/5             | 2/16           |
| 7           | 39/40                                                                   | 13/20           | 3/4             | 3/41           |
| 8           | 22/23                                                                   | 6/9             | 11/23           | 0/5            |
| 9           | 6/7                                                                     | 14/18           | 6/8             | 1/34           |
| 10          | 17/17                                                                   | 7/12            | 7/8             | 4/49           |
| 11          | 38/40                                                                   | 8/16            | 5/7             | 2/48           |
| 12          | 12/12                                                                   | 17/26           | 9/16            | 1/10           |
| total       | 214/224<br>95.5%                                                        | 94/160<br>58.5% | 89/126<br>70.6% | 17/274<br>6.2% |

Each of ten [PSI+szs] isolates were transformed with the high copy 2 μ plasmids pRS423 (pM84), pRS423-SSB1 (pM85), pRS423-ZUO1 (pM87) or pRS423-SSZ1. Each gene is expressed under their native promoter. Transformants were selected in the presence of uracil and were replica-plated to a plate lacking uracil to test the stability of [PSI+].

Table S7. The stability of [URE3] isolated in a WT strain or *ssz1*Δ strain in their original host or in a diploid formed with a wild type strain.

| Isolate no. | [URE3] isolates in<br>(no. of Ade <sup>+</sup> /total subclones) |                  |                  |                  |
|-------------|------------------------------------------------------------------|------------------|------------------|------------------|
|             | WT                                                               | WT/+             | <i>ssz1</i> Δ    | <i>ssz1</i> Δ/+  |
| 1           | 36/50                                                            | 10/15            | 38/50            | 11/15            |
| 2           | 34/50                                                            | 10/15            | 34/50            | 12/15            |
| 3           | 37/50                                                            | 9/15             | 35/50            | 12/15            |
| 4           | 38/50                                                            | 11/15            | 36/50            | 14/15            |
| 6           | 38/50                                                            | 12/15            | 40/50            | 12/15            |
| 7           | 36/50                                                            | 11/15            | 41/50            | 13/15            |
| 8           | 38/50                                                            | 12/15            | 42/50            | 12/15            |
| 9           | 41/50                                                            | 12/15            | 48/50            | 14/15            |
| 10          | 38/50                                                            | 11/15            | 41/50            | 14/15            |
| 11          | 36/50                                                            | 11/15            | 49/50            | 15/15            |
| 12          | 37/50                                                            | 12/15            | 48/50            | 15/15            |
| total       | 409/550<br>74.4%                                                 | 121/165<br>73.3% | 489/600<br>81.5% | 144/165<br>87.2% |

Eleven [URE3] isolates in a WT strain (BY241) or BY241 *ssz1*Δ strains (MS581 or MS582) were either subcloned on YPAD medium or mated with WT strain αBY241 and the diploids were subcloned on selective plates with adenine. Haploid and diploid colonies were replica-plated to –Ade plates to test the stability of [URE3]. Each [URE3] prion variant in all cases showed similar stability.

Table S8. Restored normal level of Ssz1p does not affect the loss of [URE3] variants in an *ssz1Δ* strain.

| Isolate no.           | WT [URE3] transformant<br>(Ade <sup>+</sup> /total transformants) |         | <i>ssz1Δ</i> [URE3] transformant<br>(Ade <sup>+</sup> /total transformants) |         |
|-----------------------|-------------------------------------------------------------------|---------|-----------------------------------------------------------------------------|---------|
|                       | Vector                                                            | pSSZ1   | Vector                                                                      | pSSZ1   |
| 1                     | 28/40                                                             | 24/40   | 27/40                                                                       | 28/40   |
| 2                     | 26/40                                                             | 27/40   | 29/40                                                                       | 31/40   |
| 3                     | 27/40                                                             | 30/40   | 31/40                                                                       | 26/40   |
| 4                     | 31/40                                                             | 29/40   | 30/40                                                                       | 27/40   |
| 6                     | 25/40                                                             | 27/40   | 24/40                                                                       | 29/40   |
| 7                     | 30/40                                                             | 31/40   | 31/40                                                                       | 28/40   |
| 8                     | 32/40                                                             | 28/40   | 29/40                                                                       | 29/40   |
| 9                     | 31/40                                                             | 29/40   | 39/40                                                                       | 40/40   |
| 10                    | 30/40                                                             | 34/40   | 39/40                                                                       | 39/40   |
| 11                    | 29/40                                                             | 26/40   | 40/40                                                                       | 39/40   |
| 12                    | 15/20                                                             | 31/40   | 40/40                                                                       | 39/40   |
| Total                 | 304/420                                                           | 316/440 | 359/440                                                                     | 355/440 |
| % of Ura <sup>+</sup> | 72.4%                                                             | 71.8%   | 81.6%                                                                       | 80.6%   |

Eleven WT or *ssz1Δ* strains carrying [URE3] were transformed with the *CEN* plasmid pRS316 or with the same plasmid carrying *SSZ1* under its native promoter (pM89=pSSZ1). Transformants were selected in the presence of adenine and were replica-plated to a plate lacking adenine to test the loss of [URE3].
